# Supplementary material
Source: PubMed Central journal article supplement (PMC3885420)
Supplement: NIHMS540241-supplement-Supplementary.pdf [file NIHMS540241-supplement-Supplementary.pdf]

Supplementary information to:

**Tissue factor and PAR1 promote microbiota-induced intestinal vascular remodelling**

Christoph Reinhardt, Mattias Bergentall, Thomas U. Greiner, Florence Schaffner, Gunnel Östergren-Lundén, Lars C. Petersen, Wolfram Ruf, and Fredrik Bäckhed

Content:

Supplementary Fig. 1-17

Supplementary Table 1

# Supplementary Fig. 1

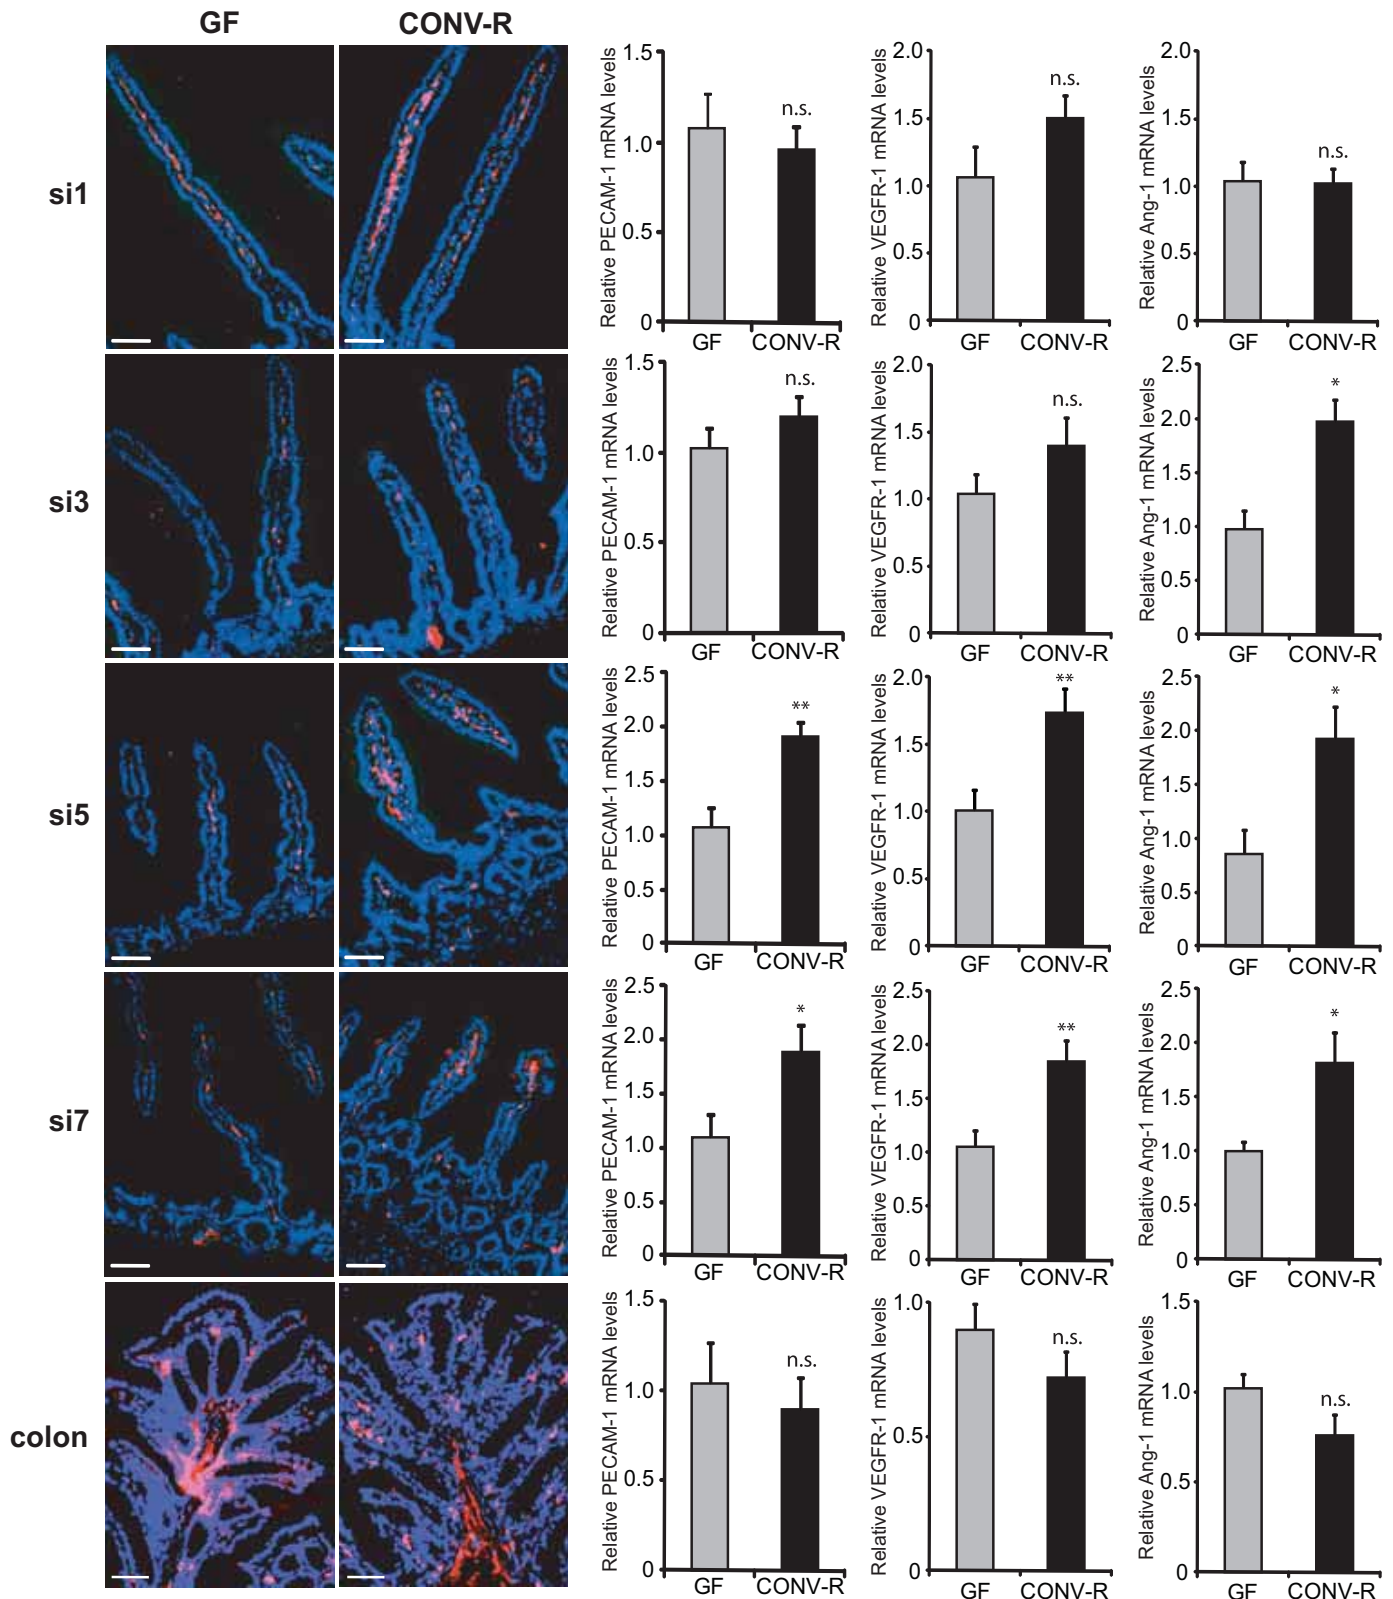

**Supplementary Fig. 1. Vascularization along the length of the gut.** PECAM-1 staining (red) of intestinal segments (small intestine divided in 8 equal-sized segments and first third of the colon) from GF and CONV-R mice. Nuclei were stained with Hoechst nuclear dye (blue). Scale bars = 50  $\mu$ m. Relative mRNA levels of the vascular markers PECAM-1 and VEGFR-1 and the angiogenic factor Ang-1 in GF and CONV-R mice (n = 4–8 mice/group). Mean values  $\pm$  s.e.m. are plotted. \* $P < 0.05$ ; \*\* $P < 0.01$ .

# Supplementary Fig. 2

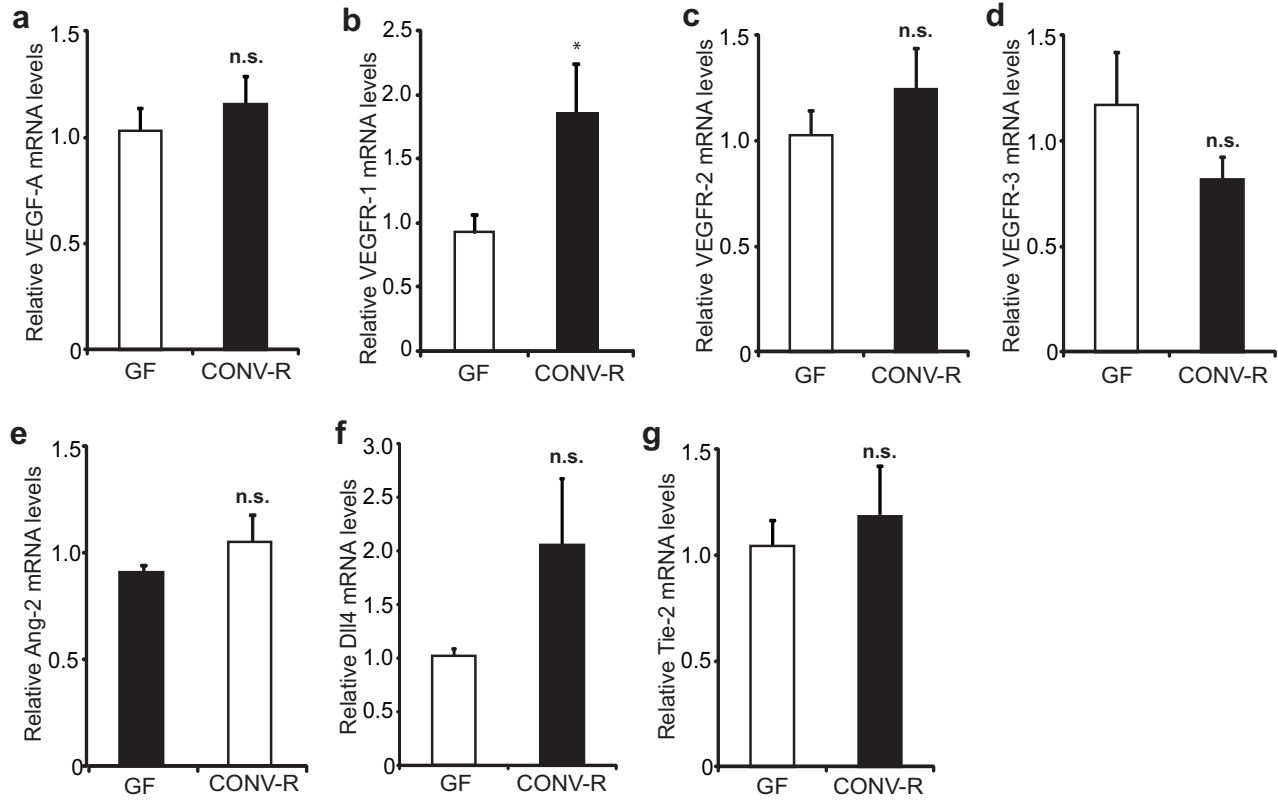

**Supplementary Fig. 2.** a-g, Quantification of small intestinal mRNA expression levels of VEGF-A, VEGFR-1, VEGFR-2, VEGFR-3, Ang-2, Dll4 and Tie-2 in GF and CONV-R mice (n = 5-11).

# Supplementary Fig. 3

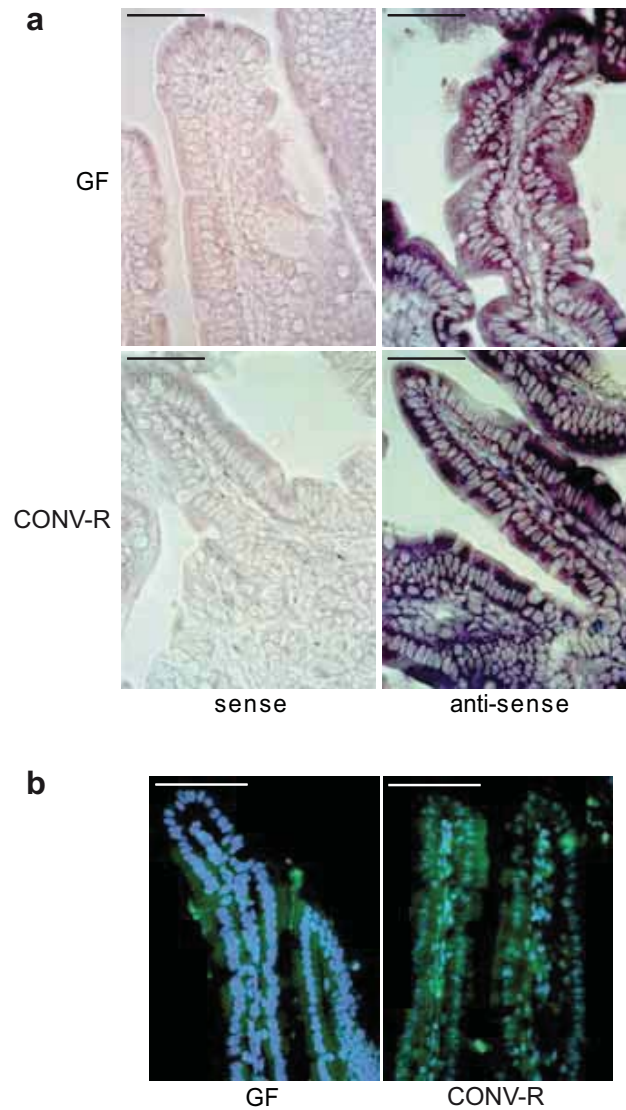

**Supplementary Fig. 3. TF is expressed by enterocytes.** a, In situ hybridization and b, Immunohistochemistry of mouse TF in small intestinal tissue from Swiss Webster mice reveals enterocytes as major sites of small intestinal TF expression. Scale bars = 50  $\mu$ m.

## Supplementary Fig. 4

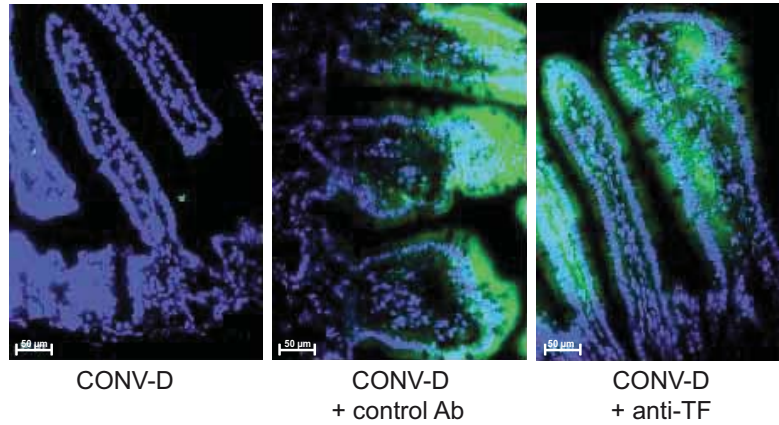

**Supplementary Fig. 4. Intraperitoneally injected antibodies target the small intestine.** Alexa 488-anti-rabbit immunostaining of small intestinal tissue in Swiss Webster mice treated with control or anti-TF antibodies. Scale bars = 50  $\mu$ m.

# Supplementary Fig. 5

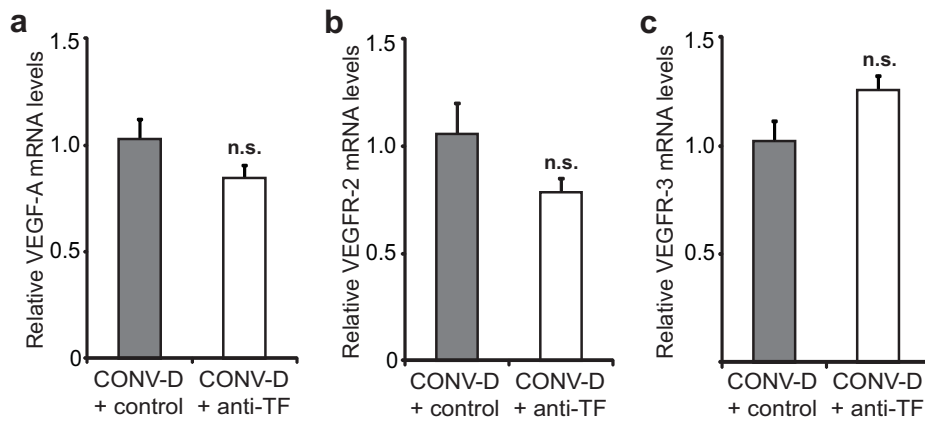

**Supplementary Fig. 5. Anti-TF treatment does not affect mRNA levels of VEGF-A, VEGFR-2 or VEGFR-3 in the small intestine.** qRT-PCR analysis of **a**, VEGF-A, **b**, VEGFR-2, and **c**, VEGFR-3 in the small intestine from CONV-D Swiss Webster mice reveals no differential expression induced by treatment with anti-TF (n = 5-6 mice/group). Mean values  $\pm$  s.e.m. are plotted.

# Supplementary Fig. 6

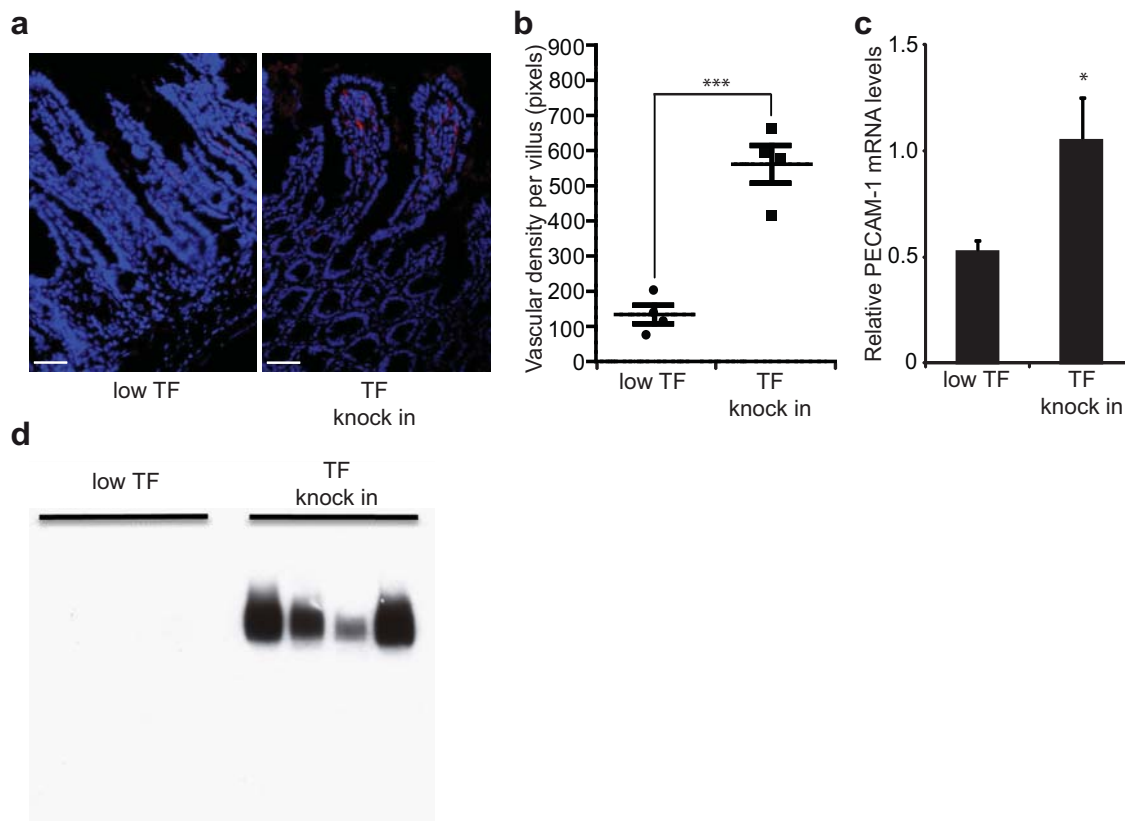

**Supplementary Fig. 6. Low TF mice have reduced levels of PECAM-1 in the small intestine.**

**a**, PECAM-1 staining of small intestinal sections from hypomorphic low-TF and TF knock in mice. **b**, Quantification of **a** (n = 4 mice/group). **c**, Relative PECAM-1 mRNA levels in small intestinal sections from low TF and TF knock in mice (n = 4-5 mice/group). **d**, Verification of the TF knock in. TF in the small intestine was immuno-precipitated with human TF-specific antibody 5G9. Immunoprecipitated TF was detected by western blotting with goat anti-human TF (n = 4 mice/group).

# Supplementary Fig. 7

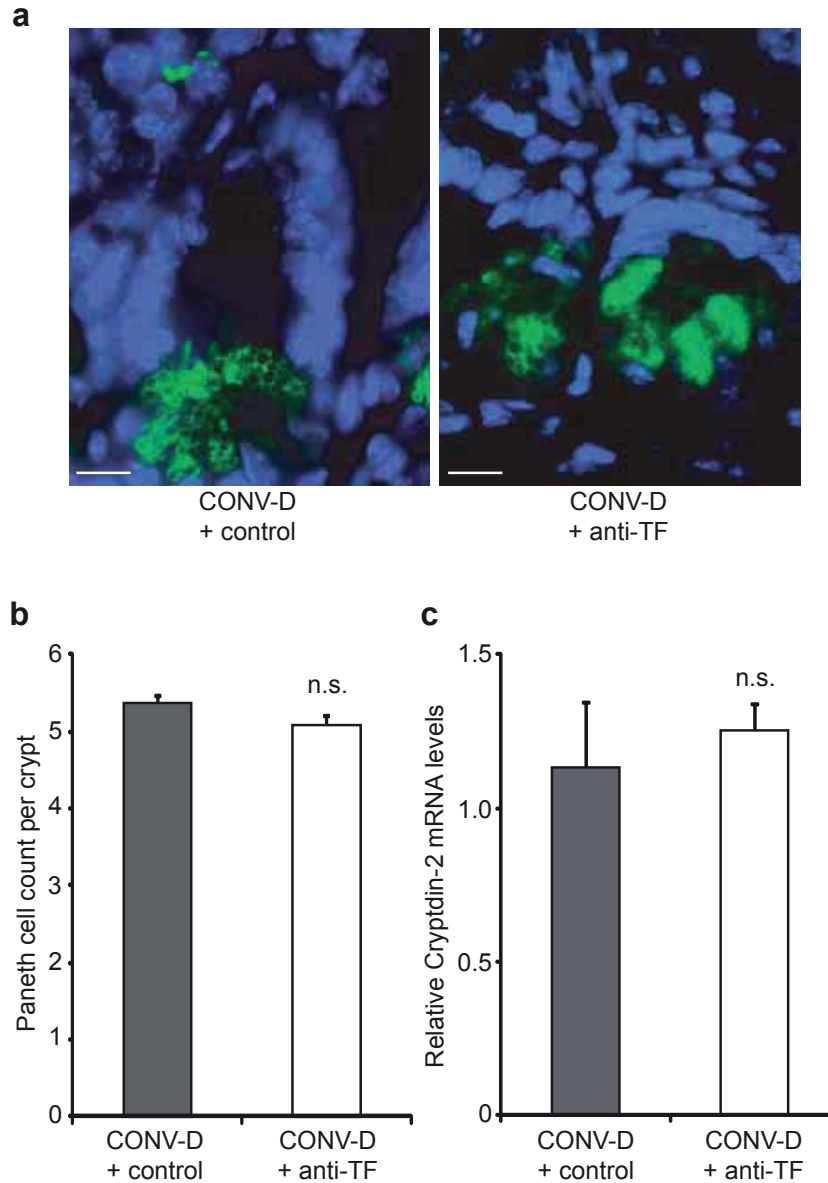

**Supplementary Fig. 7. Anti-TF treatment does not affect Paneth cell number.**

**a**, FITC-Isolectin stain of small intestinal Paneth cells localized at the bottom of each crypt. Scale bar = 10  $\mu$ m. **b**, Number of Paneth cells per small intestinal crypt in mice treated with isotype control antibody or with anti-TF antibody (n = 5 mice / group). **c**, Relative mRNA levels of the Paneth cell marker Cryptdin-2 in the small intestine (n=6 mice/group). Female Swiss Webster mice were used in all panels. Mean values  $\pm$  s.e.m. are plotted.



## Supplementary Fig. 8

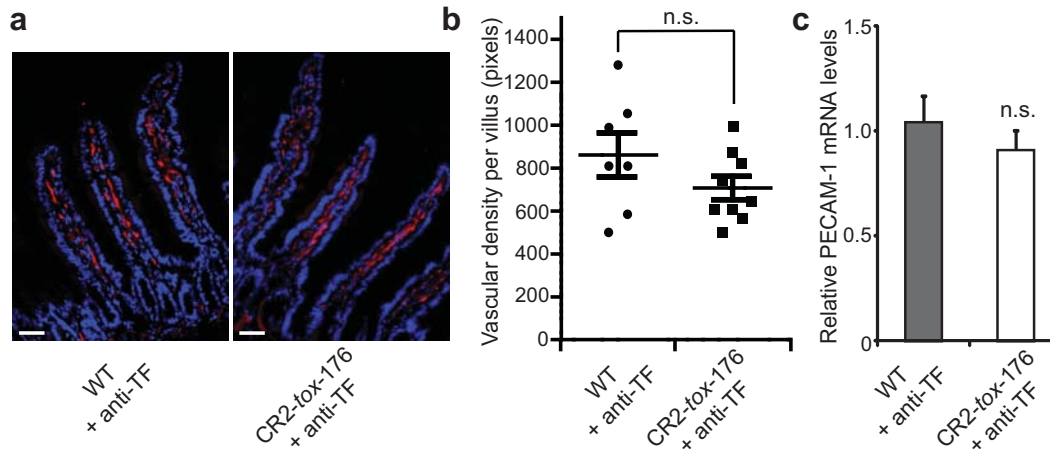

**Supplementary Fig. 8. Similar vascular density in mice that lack Paneth cells and their wild-type littermates following treatment with anti-TF.** **a.** PECAM-1 staining (red) of small intestinal sections from anti-TF-treated WT mice and anti-TF-treated CR2-*tox*-176 mice on a FUB/N genetic background that lack Paneth cells. Nuclei were stained with Hoechst nuclear dye (blue). **b.** Quantification of **a** ( $n = 7-9$  mice/group). **c.** Relative mRNA levels of the vascular marker PECAM-1 in anti-TF-treated WT mice and anti-TF-treated CR2-*tox*-176 mice ( $n = 7-9$  mice/group). Scale bars = 50  $\mu\text{m}$ . Mean values  $\pm$  s.e.m. are plotted.

# Supplementary Fig. 9

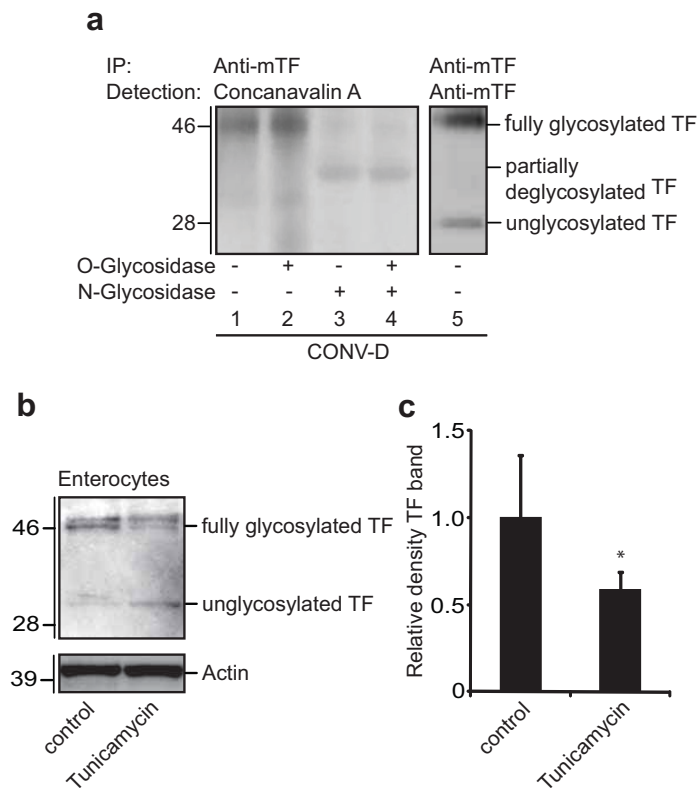

**Supplementary Fig. 9. TF is N-glycosylated.** **a**, Detection of mannose residues using concanavalin A on TF after immunoprecipitation with anti-TF antibody and treatment with glycosidases in small intestinal lysates from CONV-D mice. Note that concanavalin A did not recognize the unglycosylated form of TF. **b**, Anti-TF immunoblot of primary enterocytes (from CONV-R mice) incubated in the absence and presence of tunicamycin (10  $\mu\text{mol/l}$ ) for 2 h. **c**, Quantification of **b** (n = 5 mice/group).

# Supplementary Fig. 10

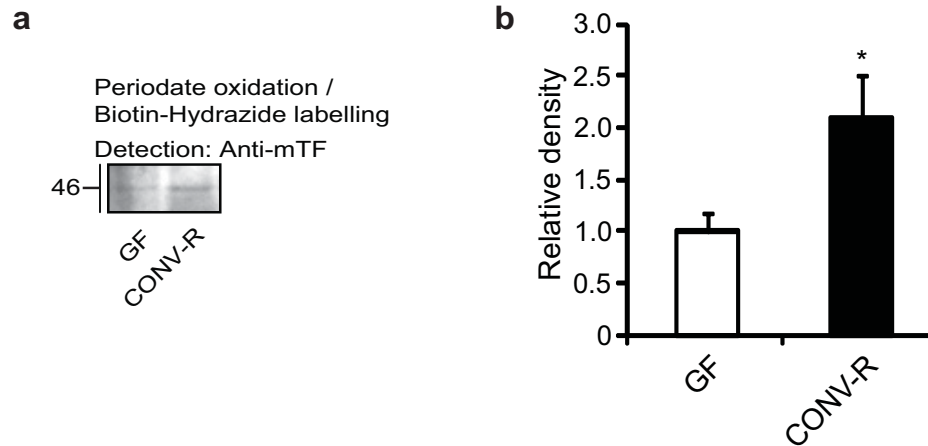

**Supplementary Fig. 10. Increased surface localization of glycosylated TF in colonized mice.** **a**, Enterocytes from GF and CONV-R Swiss Webster mice were isolated and surface carbohydrates were labeled with biotin-hydrazide after periodate oxidation followed by pull-down with streptavidin and immunoblotting with anti-TF antibody. **b**, Quantification of **a** (n = 5 mice/group). \*  $P < 0.05$

# Supplementary Fig. 11

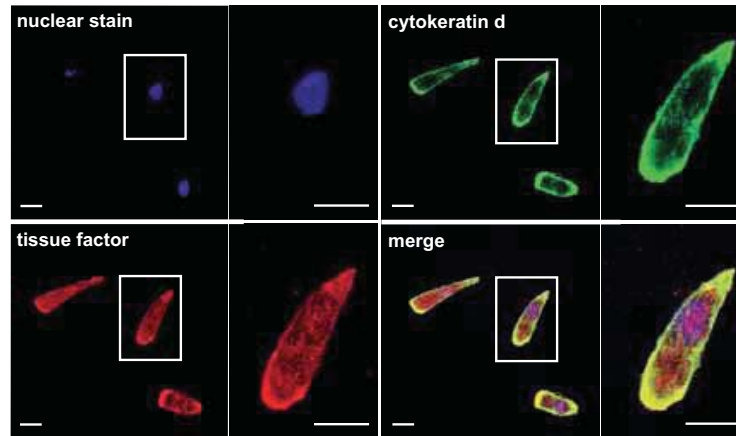

**Supplementary Fig. 11. TF is expressed on the cell surface of enterocytes.** Confocal immunofluorescence imaging of primary enterocytes isolated from CONV-R mice. Scale bars = 10  $\mu\text{m}$ .

# Supplementary Fig. 12

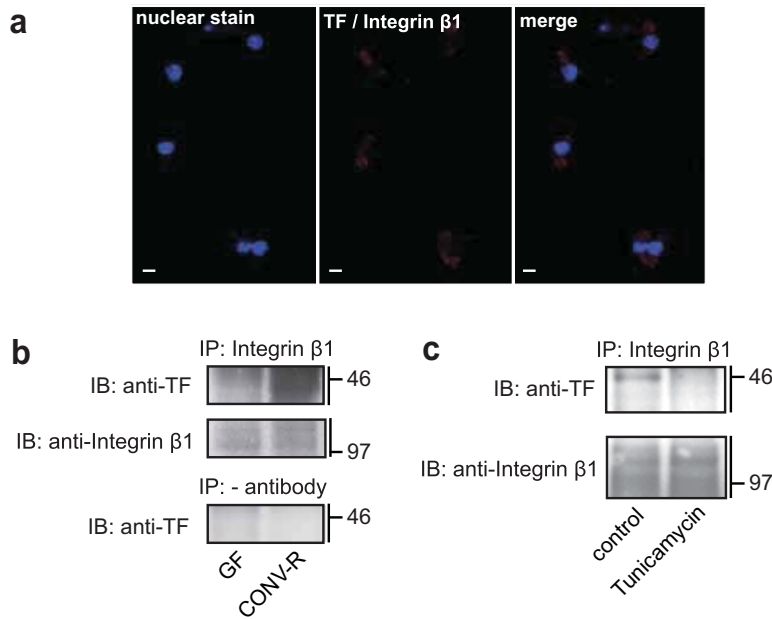

## Supplementary Fig. 12. Increased TF-integrin association in colonized mice.

a, Proximity ligation assay reveals co-localization of TF with  $\beta$ 1 integrin in isolated primary enterocytes from CONV-R mice. Co-immunoprecipitation of TF with  $\beta$ 1 integrin in small intestinal lysates from **b**, GF and CONV-R mice and **c**, CONV-R mice intraperitoneally injected with DMSO (control) and or tunicamycin (1 mg/kg body weight). Cells or small intestinal samples from Swiss Webster mice were used in all panels. Scale bars = 10  $\mu$ m.

# Supplementary Fig. 13

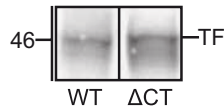

**Supplementary Fig. 13. Deletion of the cytoplasmic domain does not affect expression of TF.** TF immunoblot of small intestinal tissue from WT and  $\Delta$ CT mice on a C57Bl6/J genetic background. Note that deletion of the cytoplasmic domain removes only  $\sim 2$  kDa of the 25 kDa core protein. This reduction in mass has little effect on the mobility of the protein, which is highly glycosylated in the extracellular domain.

# Supplementary Fig. 14

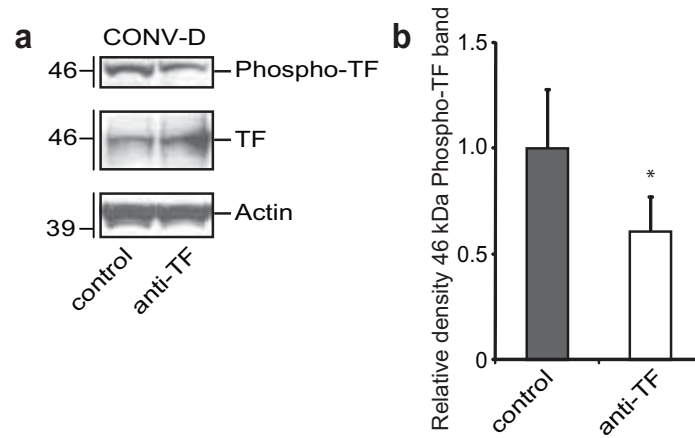

**Supplementary Fig. 14. Anti TF-treatment reduces TF-phosphorylation.** **a**, Anti-TF and anti-phospho-TF immunoblots of small intestinal lysates from CONV-D mice treated with control or anti-TF antibody. **b**, Quantification of **a** (n = 7 mice/group). Mean values  $\pm$  s.e.m. are plotted. \*P < 0.05.

# Supplementary Fig. 15

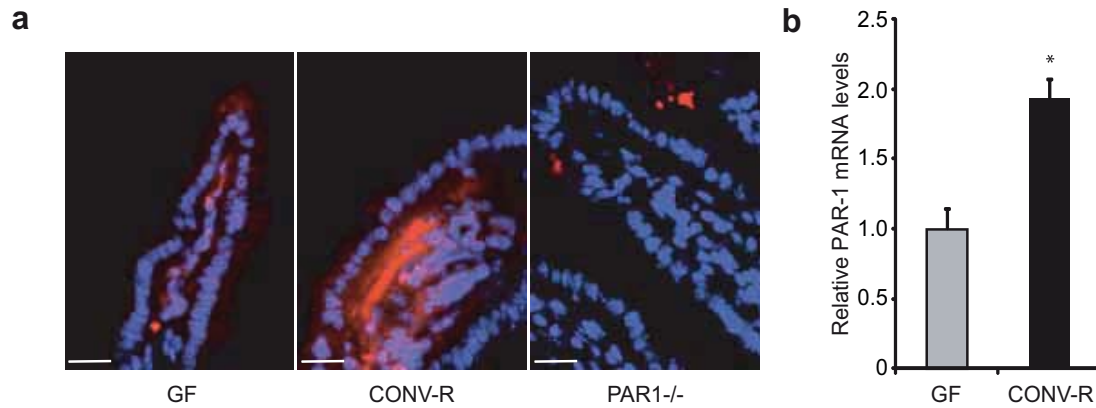

**Supplementary Fig. 15. PAR1 is expressed in enterocytes and endothelial cells in the small intestine.** **a**, PAR1 staining (red) of small intestinal tissue from GF and CONV-R Swiss Webster mice. Tissue from PAR1<sup>-/-</sup> mice were used as a specificity control. Scale bars = 20  $\mu$ m. **b**, qRT-PCR analysis of PAR1 expression in isolated primary enterocytes from GF and CONV-R Swiss Webster mice (n = 10-11 mice). Mean values  $\pm$ s.e.m. are plotted. \*  $P < 0.05$ .



## Supplementary Fig. 16

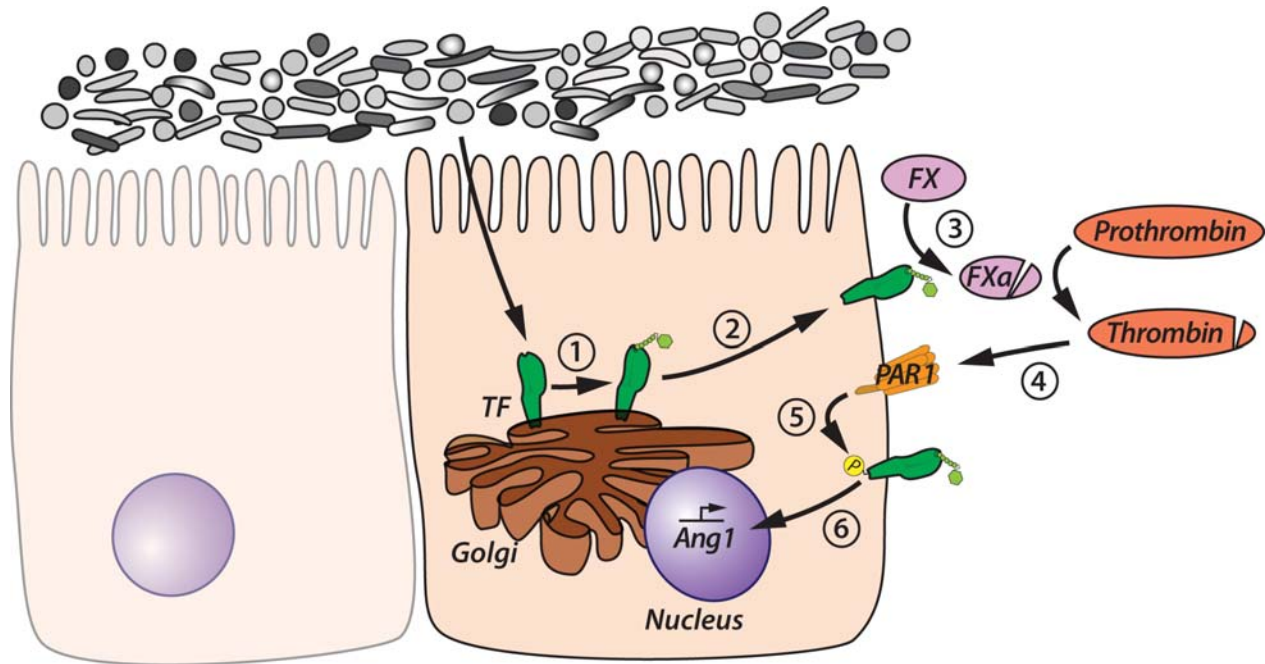

**Supplementary Fig. 16. Proposed mechanism for microbiota-induced vascular remodelling.** (1) The gut microbiota promotes glycosylation and (2) cell surface localization of TF. (3) Surface localized TF generates FXa, (4) which is required for thrombin generation. (5) PAR-1 activation results in TF phosphorylation, (6) which is associated with increased Ang1 expression.

# Supplementary Fig. 17

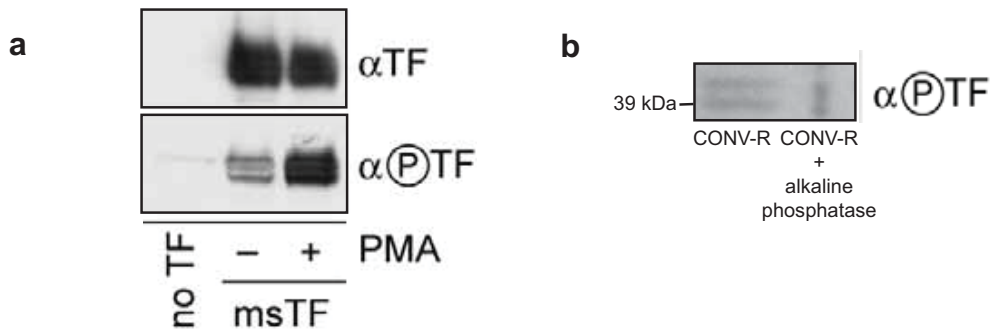

**Supplementary Fig. 17. Antibody reagents to detect phosphorylation of mouse TF.** **a**, Antibodies were raised in rabbits to purified mouse TF extracellular domain expressed in *Escherichia coli* and to KLH coupled synthetic peptide corresponding to Ser/Thr phosphorylated mouse cytoplasmic domain. Western blotting of HUVEC lysates transduced without or with mouse TF expressing adenovirus. Cells were stimulated for 1 h with PMA to induce TF phosphorylation. **b**, Phosphatase control. Small intestinal lysates from CONV-R Swiss Webster mice were incubated with 100 units of alkaline phosphatase. TF-phosphorylation was detected with the antibody raised against Ser/Thr phosphorylated mouse cytoplasmic domain.

**Supplementary table 1. Primer sequences used in this study.**

| <b>Gene</b>          | <b>Forward primer</b>                | <b>Reverse primer</b>                | <b>Amplicon length</b> |
|----------------------|--------------------------------------|--------------------------------------|------------------------|
| TF                   | AAC CCA CCA ACT<br>ATA CCT ACA CT    | GTC TGT GAG GTC<br>GCA CTC G         | 101 bp                 |
| PECAM-1              | CTG CCA GTC CGA<br>AAA TGG AAC       | CTT CAT CCA CTG<br>GGG CTA TC        | 218 bp                 |
| VEGFR-1              | GAG GAG GAT GAG<br>GGT GTC TAT AGG T | GTG ATC AGC TCC<br>AGG TTT GAC TT    | 116 bp                 |
| VEGFR-2              | GCC CTG CTG TGG<br>TCT CAC TAC       | CAA AGC ATT GCC<br>CAT TCG AT        | 114 bp                 |
| VEGFR-3              | CTG GCA AAT GGT<br>TAC TCC ATG A     | ACA ACC CGT GTG<br>TCT TCA CTG       | 182 bp                 |
| VEGF-A               | AGT CCC ATG AAG<br>TGA TCA AGT TCA   | ATC CGC ATG ATC<br>TGC ATG G         | 220 bp                 |
| Ang-1                | CAT TCT TCG CTG<br>CCA TTC TG        | GCA CAT TGC CCA<br>TGT TGA ATC       | 103 bp                 |
| Ang-2                | CAG CCA CGG TCA<br>ACA ACT C         | CTT CTT TAC GGA<br>TAG CAA CCG AG    | 123 bp                 |
| Defcr-2 (Cryptdin-2) | CTG CTC ACC AAT<br>CCT CCC A         | GCC TGG ACC TGA<br>AAG GAC AGT A     | 267 bp                 |
| PAR-1                | TGA ACC CCC GCT<br>CAT TCT TTC       | CCA GCA GGA CGC<br>TTT CAT TTT T     | 105 bp                 |
| PAR-2                | CAT GTT CAA TTA<br>CTT CCT CTC ACT   | GGT TTT AAC ACT<br>GGT TGA GCT TGA   | 472 bp                 |
| asTF                 | TTC CTC ACC CTG<br>CGG CAA GTC T     | AGT GTT TCT TTC<br>CCG TGC TTG AGC C | 85 bp                  |
| DII4                 | GGA ACC TTC TCA<br>CTC AAC ATC C     | CTC GTC TGT TCG<br>CCA AAT CT        | 141 bp                 |
| Tie-2                | GAG TCA GCT TGC<br>TCC TTT ATG G     | AGA CAC AAG AGG<br>TAG GGA ATT G     | 77 bp                  |
| L32                  | CCT CTG GTG AAG<br>CCC AAG ATC       | TCT GGG TTT CCG<br>CCA GTT T         | 102 bp                 |
